# Supplementary material for: Ultrabroad Microwave Absorption Ability and Infrared Stealth Property of Nano-Micro CuS@rGO Lightweight Aerogels
Source: PubMed Central journal article supplement (PMC9392679; doi:10.1007/s40820-022-00906-5), 2022-08-20
Supplement: 40820_2022_906_MOESM1_ESM.pdf [file 40820_2022_906_MOESM1_ESM.pdf]

Supporting Information for

## Ultrabroad Microwave Absorption Ability and Infrared Stealth Property of Nano-Micro CuS@rGO Lightweight Aerogels

Yue Wu<sup>1</sup>, Yue Zhao<sup>1</sup>, Ming Zhou<sup>1</sup>, Shujuan Tan<sup>1,\*</sup>, Reza Peymanfar<sup>2</sup>, Bagher Aslibeiki<sup>3</sup>, Guangbin Ji<sup>1,\*</sup>

<sup>1</sup> College of Materials Science and Technology, Nanjing University of Aeronautics and Astronautics, Nanjing 210016, P. R. China

<sup>2</sup> Department of Chemical Engineering, Energy Institute of Higher Education, Saveh, Iran

<sup>3</sup> Faculty of Physics, University of Tabriz, Tabriz, 51666-16471, Iran

\*Corresponding authors. E-mail: [gjji@nuaa.edu.cn](mailto:gjji@nuaa.edu.cn) (Guangbin Ji); [tanshujuan@nuaa.edu.cn](mailto:tanshujuan@nuaa.edu.cn) (Shujuan Tan)

### Supplementary Tables and Figures

**Table S1** Physical parameters of rC composite aerogels

| Samples | Bottom radius (cm) | Height (cm) | Weight (g) | Density (g cm <sup>-3</sup> ) |
|---------|--------------------|-------------|------------|-------------------------------|
| rC-1    | 0.92               | 2.27        | 0.0722     | 0.0110                        |
| rC-2    | 1.10               | 2.27        | 0.0980     | 0.0113                        |
| rC-3    | 0.91               | 2.31        | 0.0725     | 0.0121                        |
| rC-4    | 0.96               | 2.46        | 0.1087     | 0.0152                        |
| rC-5    | 0.81               | 2.28        | 0.0752     | 0.0160                        |

**Table S2** MA ability and IR emissivity of rC aerogels

| Samples | RL <sub>min</sub> (dB) | d (mm) | EAB (GHz) | d (mm) | Filler content (wt%) | IR emissivity |         |
|---------|------------------------|--------|-----------|--------|----------------------|---------------|---------|
|         |                        |        |           |        |                      | 3~5 mm        | 8~14 mm |
| rC-1    | -12.3                  | 2.0    | 5.56      | 2.0    | 6                    | 0.9858        | 0.9914  |
| rC-2    | -16.1                  | 2.0    | 5.48      | 2.5    | 6                    | 0.9412        | 0.9568  |
| rC-3    | -40.2                  | 2.3    | 8.44      | 2.8    | 6                    | 0.9062        | 0.9263  |
| rC-4    | -50.4                  | 2.0    | 7.16      | 2.3    | 6                    | 0.8680        | 0.9115  |
| rC-5    | -38.4                  | 3.0    | 6.36      | 2.5    | 6                    | 0.6442        | 0.8160  |

**Table S3** Microwave absorption performance of RC aerogels

| Samples | RL <sub>min</sub> (dB) | d (mm) | EAB (GHz) | d (mm) | Filler content (wt%) |
|---------|------------------------|--------|-----------|--------|----------------------|
| RC-1    | -32.0                  | 4.0    | 5.80      | 2.0    | 2                    |
|         | -10.3                  | 3.5    | 1.20      | 3.5    | 1                    |
| RC-2    | -16.6                  | 2.0    | 5.12      | 2.0    | 2                    |
|         | -17.8                  | 3.5    | 4.88      | 3.0    | 1                    |
| RC-3    | -21.5                  | 2.5    | 6.30      | 2.5    | 2                    |
|         | -37.9                  | 2.85   | 6.50      | 2.5    | 1                    |
| RC-4    | -60.3                  | 3.5    | 7.20      | 2.45   | 2                    |
|         | -63.5                  | 2.25   | 5.80      | 2.25   | 1                    |
| RC-5    | -16.2                  | 2.5    | 5.70      | 2.5    | 2                    |
|         | -25.3                  | 3.0    | 6.04      | 3.0    | 1                    |

**Table S4** Surface temperature of rC composite aerogels

| $T$ (°C) \ $t$ (min) | 0    | 5    | 10   | 15   | 20   | 25   | 30   |
|----------------------|------|------|------|------|------|------|------|
| rC-1                 | 26.4 | 31.6 | 31.1 | 29.9 | 30.7 | 30.5 | 30.6 |
| rC-2                 | 26.6 | 31.4 | 31.5 | 31.7 | 30.7 | 30.0 | 30.3 |
| rC-3                 | 26.4 | 28.4 | 30.5 | 30.4 | 30.7 | 30.1 | 29.7 |
| rC-4                 | 26.6 | 27.1 | 27.4 | 26.6 | 26.8 | 26.8 | 26.8 |
| rC-5                 | 26.5 | 27.3 | 27.1 | 27.2 | 26.8 | 26.6 | 26.5 |

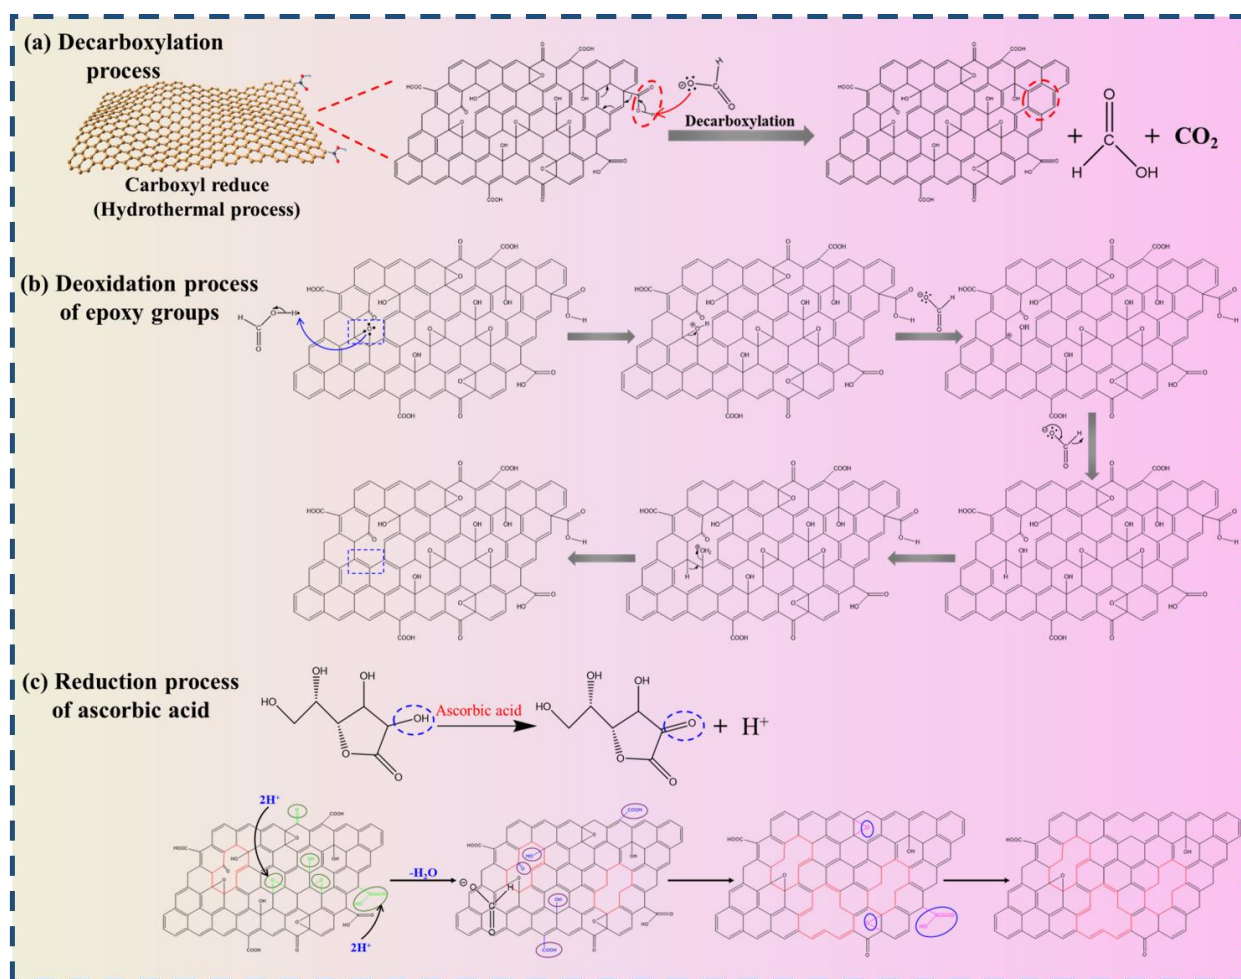**Fig. S1** Hydrothermal reduction mechanisms of **a** Deoxidation process of carboxyl groups and **b** deoxidation process of epoxy groups of rC composite aerogels. **c** Reduction process of ascorbic acid for RC composite aerogels

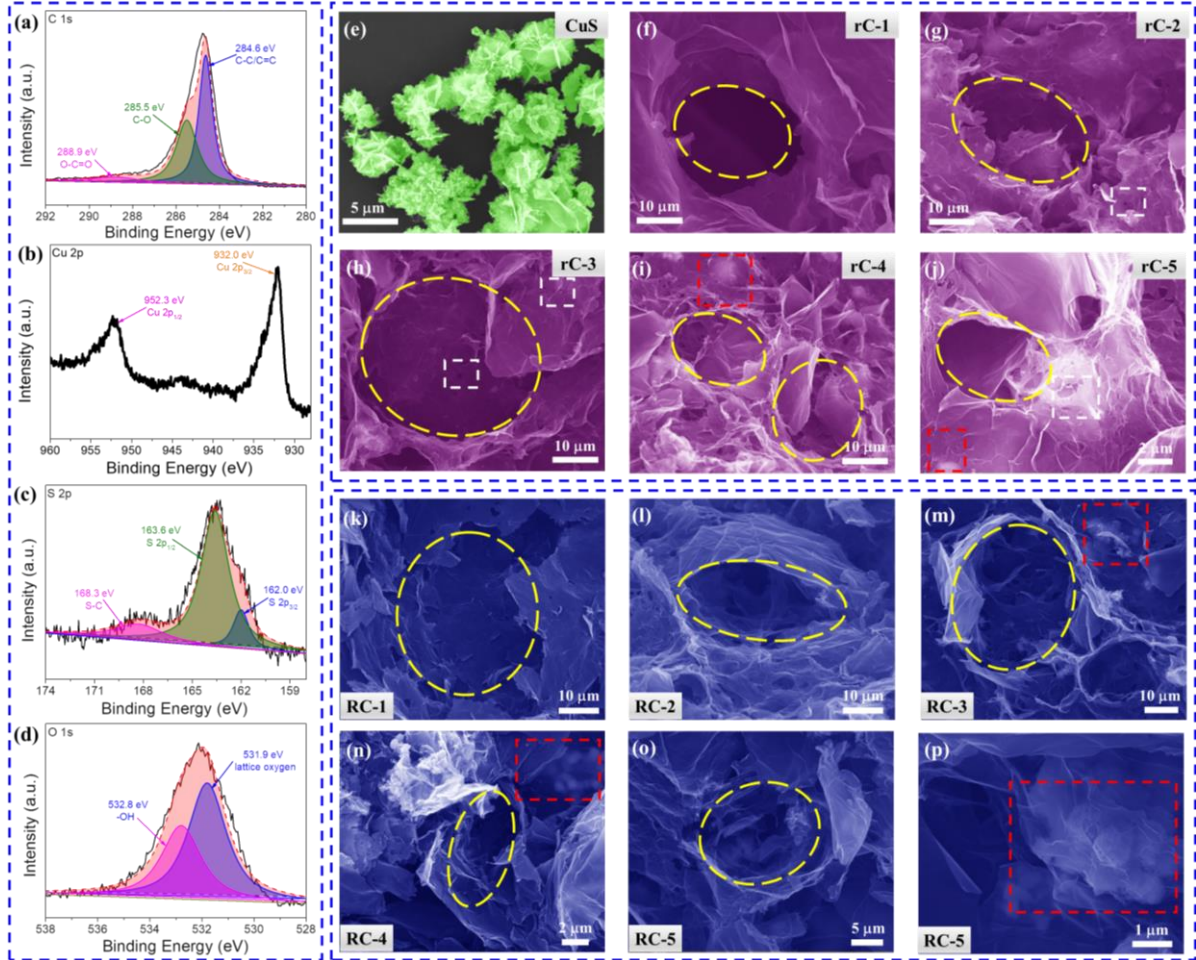

**Fig. S2** XPS spectra of rC-4: **a** C 1s, **b** Cu 2p, **c** S 2p and **d** O 1s. SEM images of **e** CuS, **f** rC-1, **g** rC-2, **h** rC-3, **i** rC-4, and **j** rC-5. SEM images of **k** RC-1, **l** RC-2, **m** RC-3, **n** RC-4, **o**, **p** RC-5

## Nano-Micro Letters

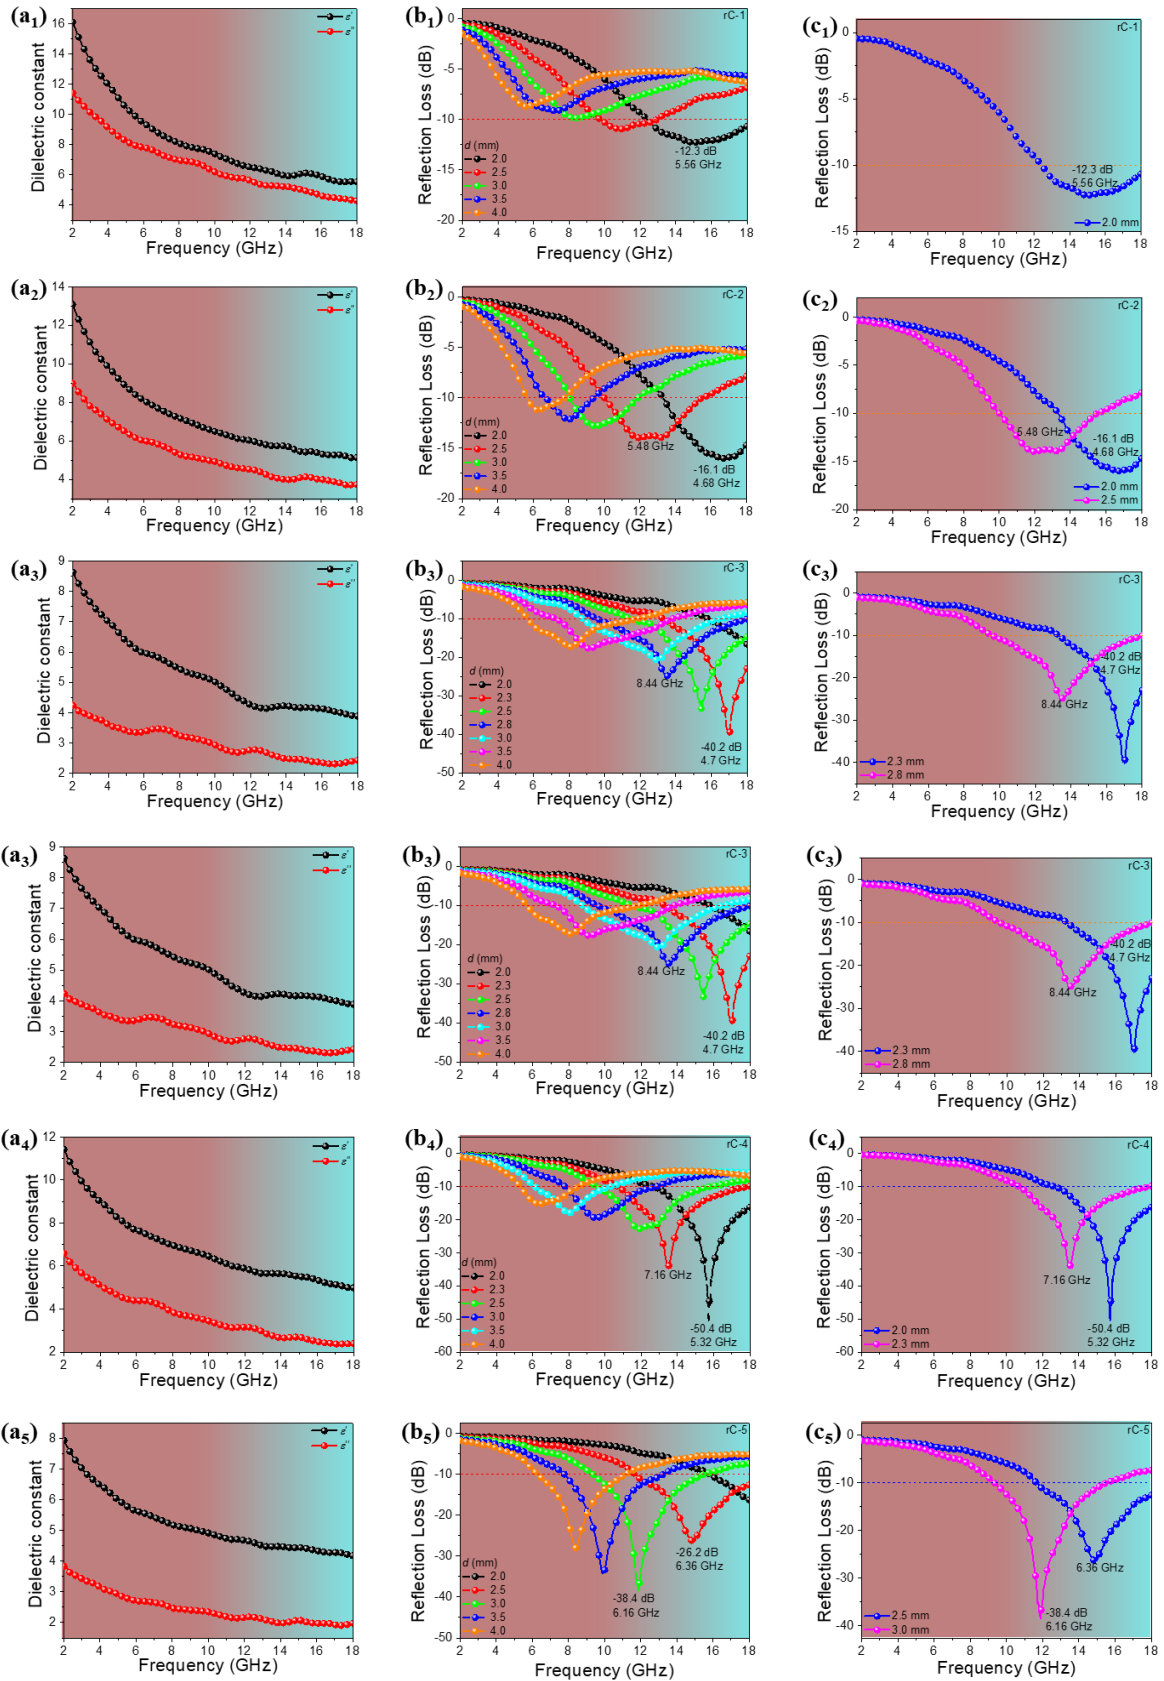

**Fig. S3** a<sub>1</sub>-a<sub>5</sub> Dielectric constant of  $\epsilon'$  and  $\epsilon''$ , b<sub>1</sub>-b<sub>5</sub> RL curves, c<sub>1</sub>-c<sub>5</sub> RL curves with minimum RL and broadest EAB of rC composite aerogels at specific thicknesses

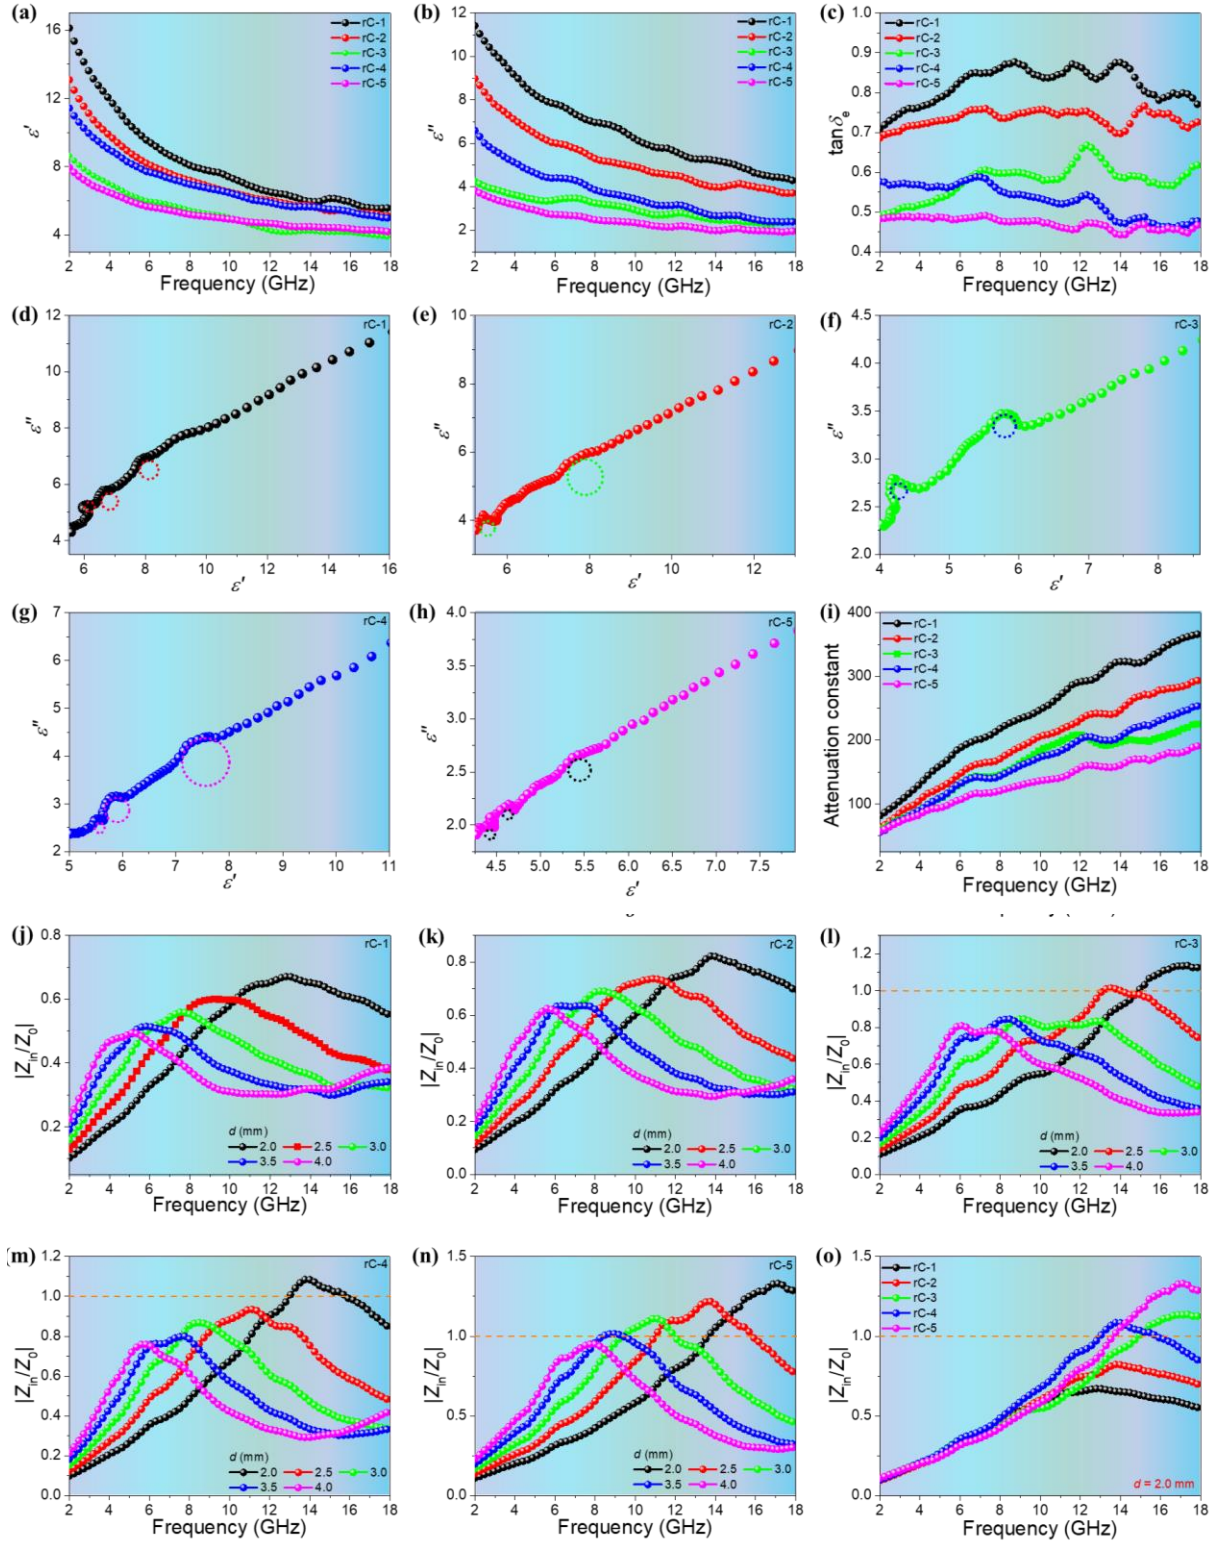

**Fig. S4** **a**  $\epsilon'$ , **b**  $\epsilon''$ , **c**  $\tan\delta_e$ , Cole-Cole curves of **d** rC-1, **e** rC-2, **f** rC-3, **g** rC-4 and **h** rC-5. **i** Attenuation constant of rC composite aerogels. Normalized input impedance  $|Z_{in}/Z_0|$  of **j** rC-1, **k** rC-2, **l** rC-3, **m** rC-4 and **n** rC-5. **o** Normalized input impedance of rC composite aerogels at the thickness of 2.0 mm

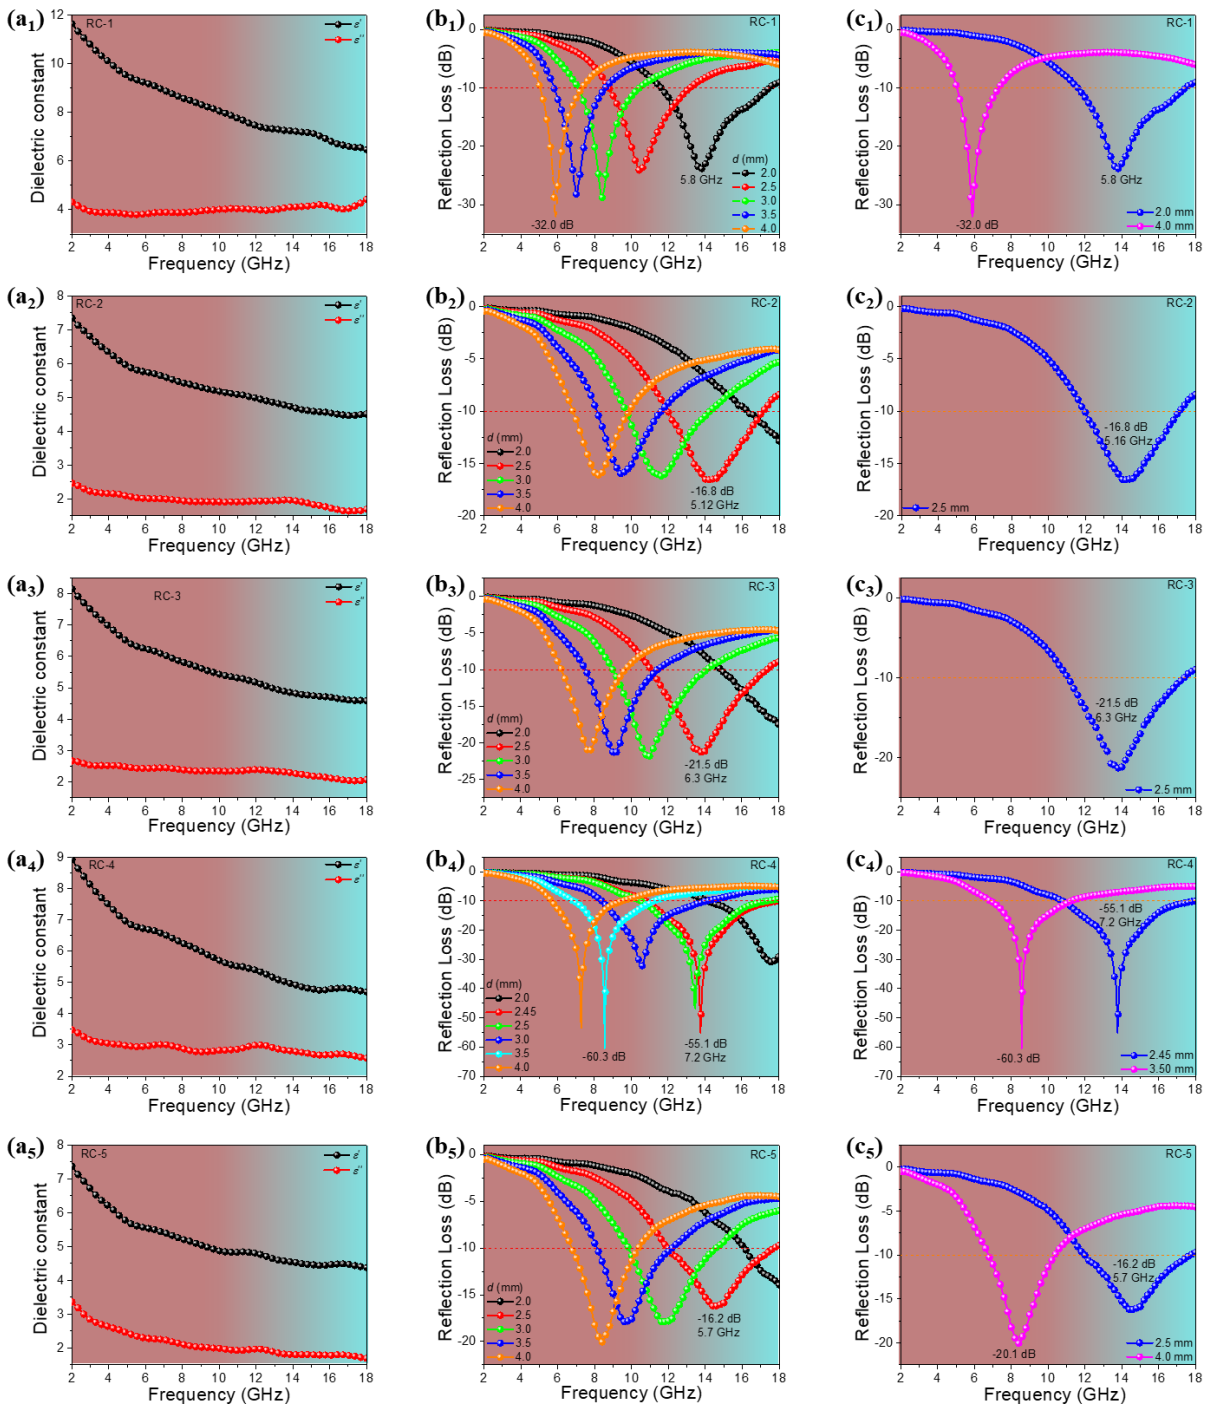

**Fig. S5** a<sub>1</sub>-a<sub>5</sub> Dielectric constant of  $\epsilon'$  and  $\epsilon''$ , b<sub>1</sub>-b<sub>5</sub> RL curves, c<sub>1</sub>-c<sub>5</sub> RL curves with minimum RL and broadest EAB of RC composite aerogels at specific thicknesses

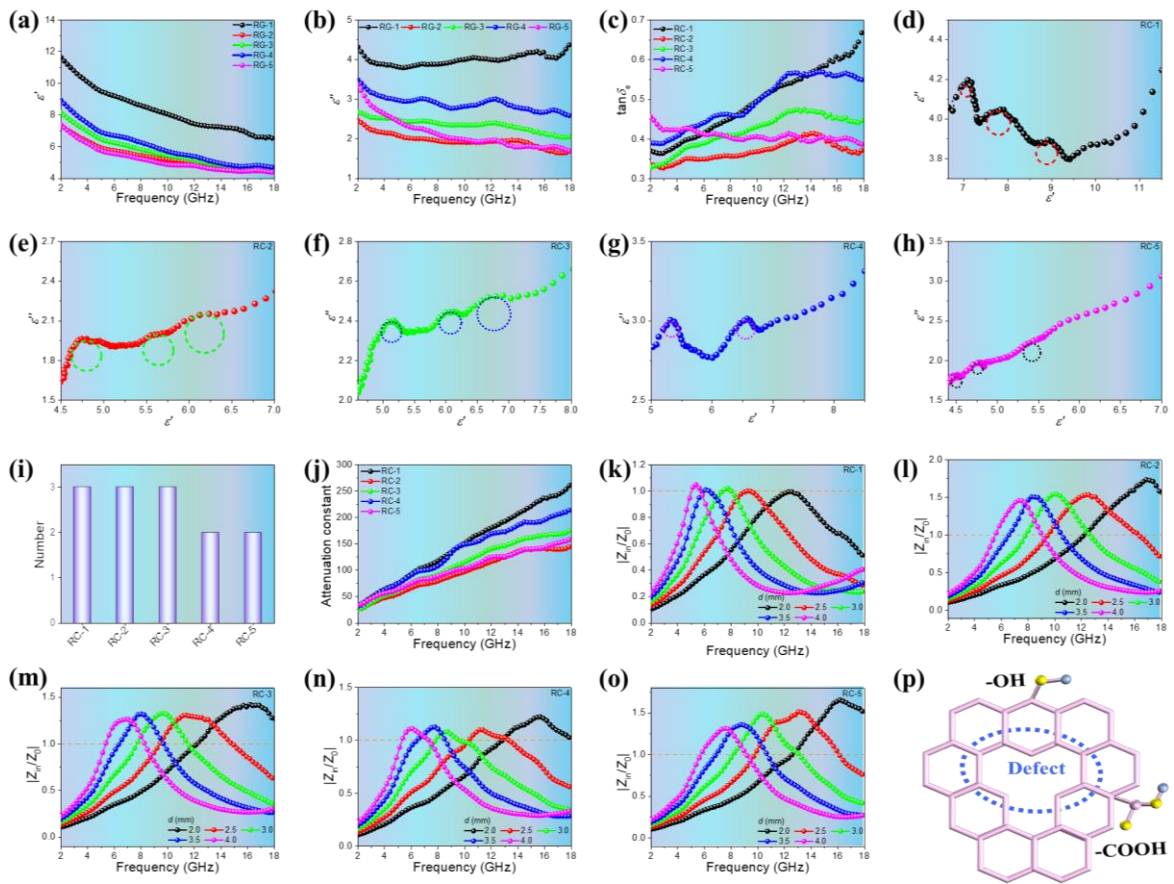

**Fig. S6** **a**  $\epsilon'$ , **b**  $\epsilon''$ , **c**  $\tan\delta_e$  of RC composite aerogels. Cole-Cole curves of **d** RC-1, **e** RC-2, **f** RC-3, **g** RC-4 and **h** RC-5. **i** Number of Cole-Cole semicircles of RC composite aerogels. **j** Attenuation constant of RC composite aerogels. Normalized input impedance  $|Z_{in}/Z_0|$  of **k** RC-1, **l** RC-2, **m** RC-3, **n** RC-4 and **o** RC-5. **p** Defects and oxygen-containing functional group in RC composite aerogels

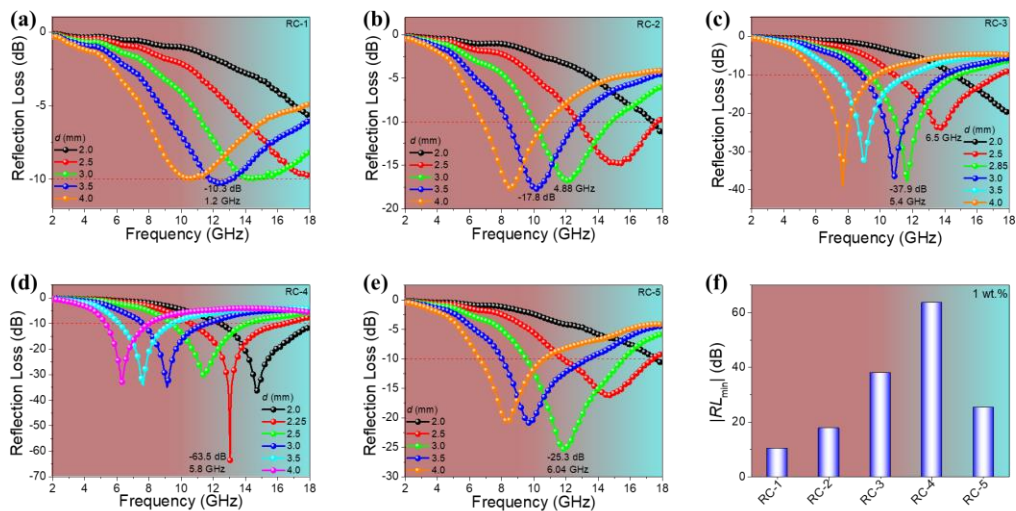

**Fig. S7** RL curves of **a** RC-1, **b** RC-2, **c** RC-3, **d** RC-4 and **e** RC-5. **f** Histogram of  $|RL_{min}|$  vis RC composite aerogels with the low filler content of 1 wt.%

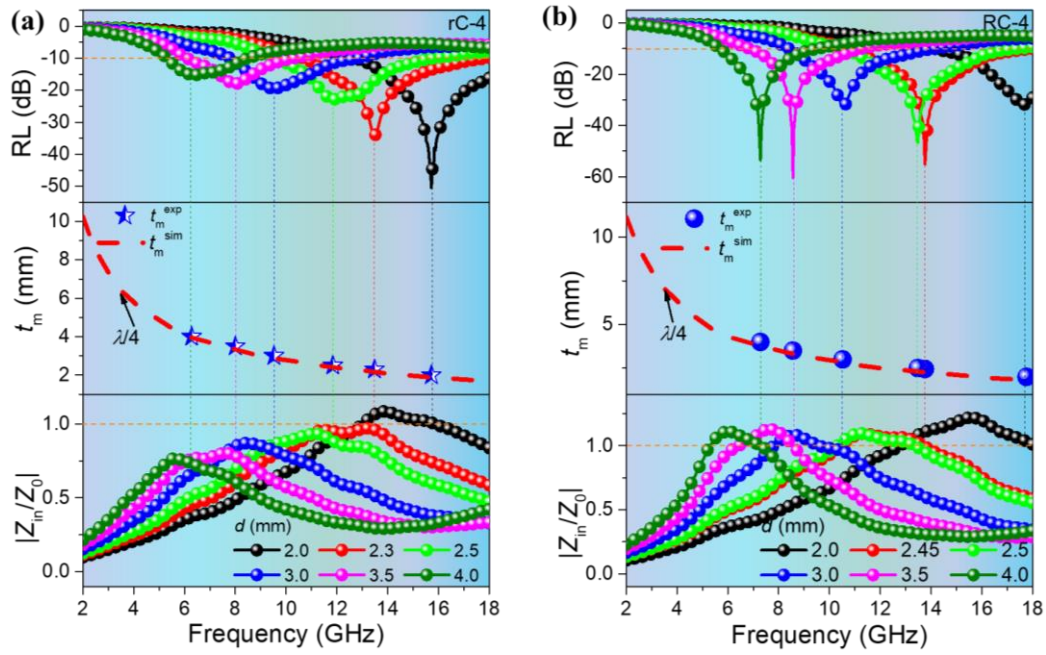

**Fig. S8** RL,  $\lambda/4$  and  $|Z_{in}/Z_0|$  of **a** rC-4 and **b** RC-4

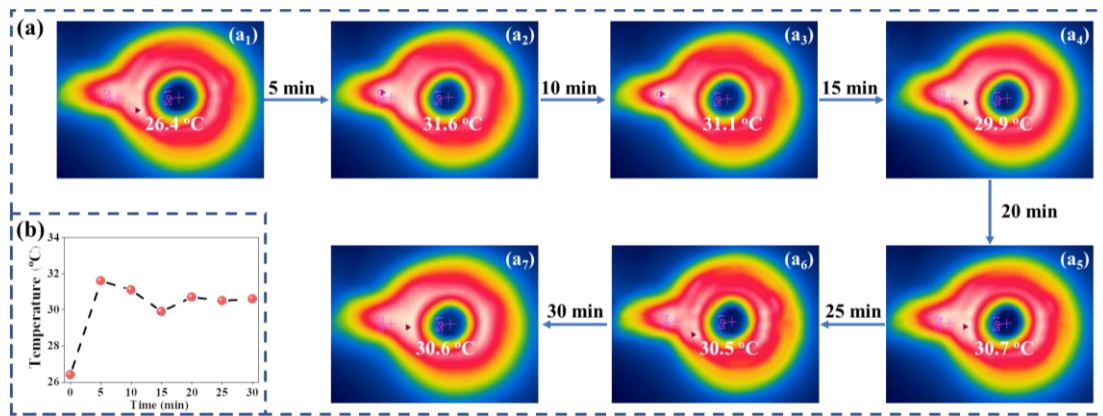

**Fig. S9** **a** Thermal IR images of rC-1 at different heating times. **b** Surface temperature curve of rC-1

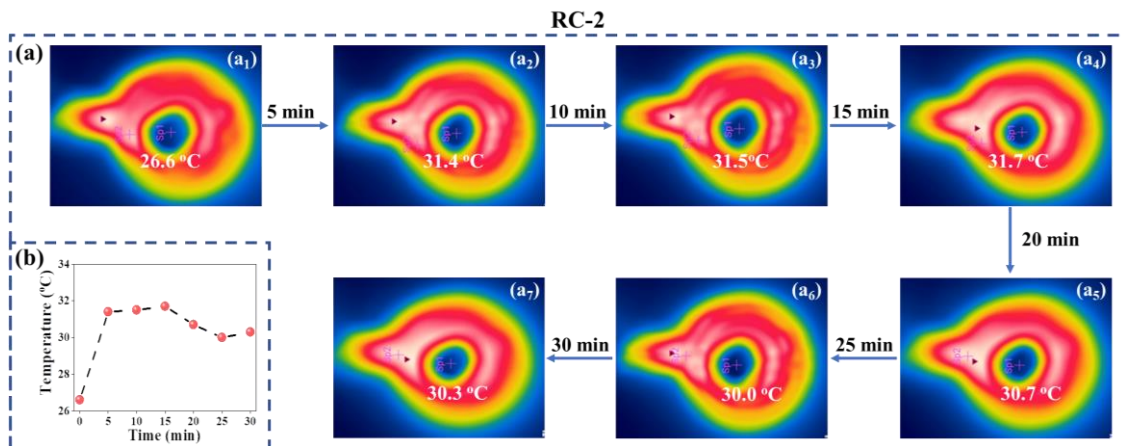

**Fig. S10** **a** Thermal IR images of rC-2 at different heating times. **b** Surface temperature curve of rC-2



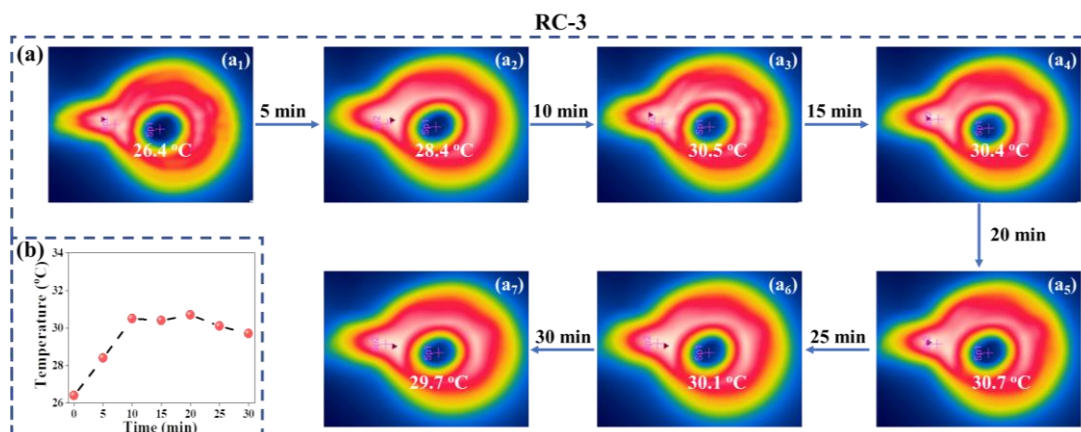

**Fig. S11** a Thermal IR images of rC-3 at different heating times. b Surface temperature curve of rC-3

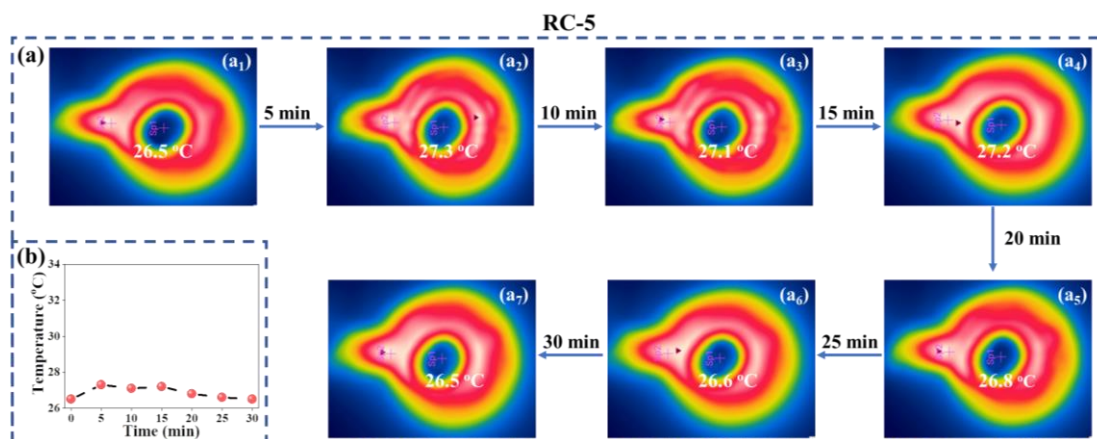

**Fig. S12** a Thermal IR images of rC-5 at different heating times. b Surface temperature curve of rC-5

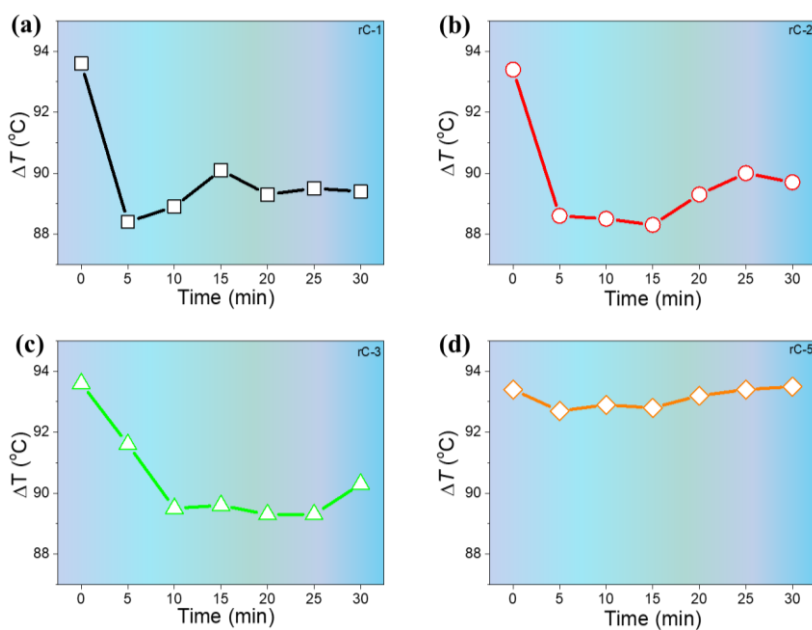

**Fig. S13** Difference between heating temperature and surface temperature of a rC-1, b rC-2, c rC-3 and d rC-5
